# Supplementary material
Source: Springer Nature journal article supplement (https://www.springermedizin.de/resource/supplementary/12889_2010_3561_MOESM4_ESM.pdf/9489290)
Supplement: MOESM4 [file 9489290]

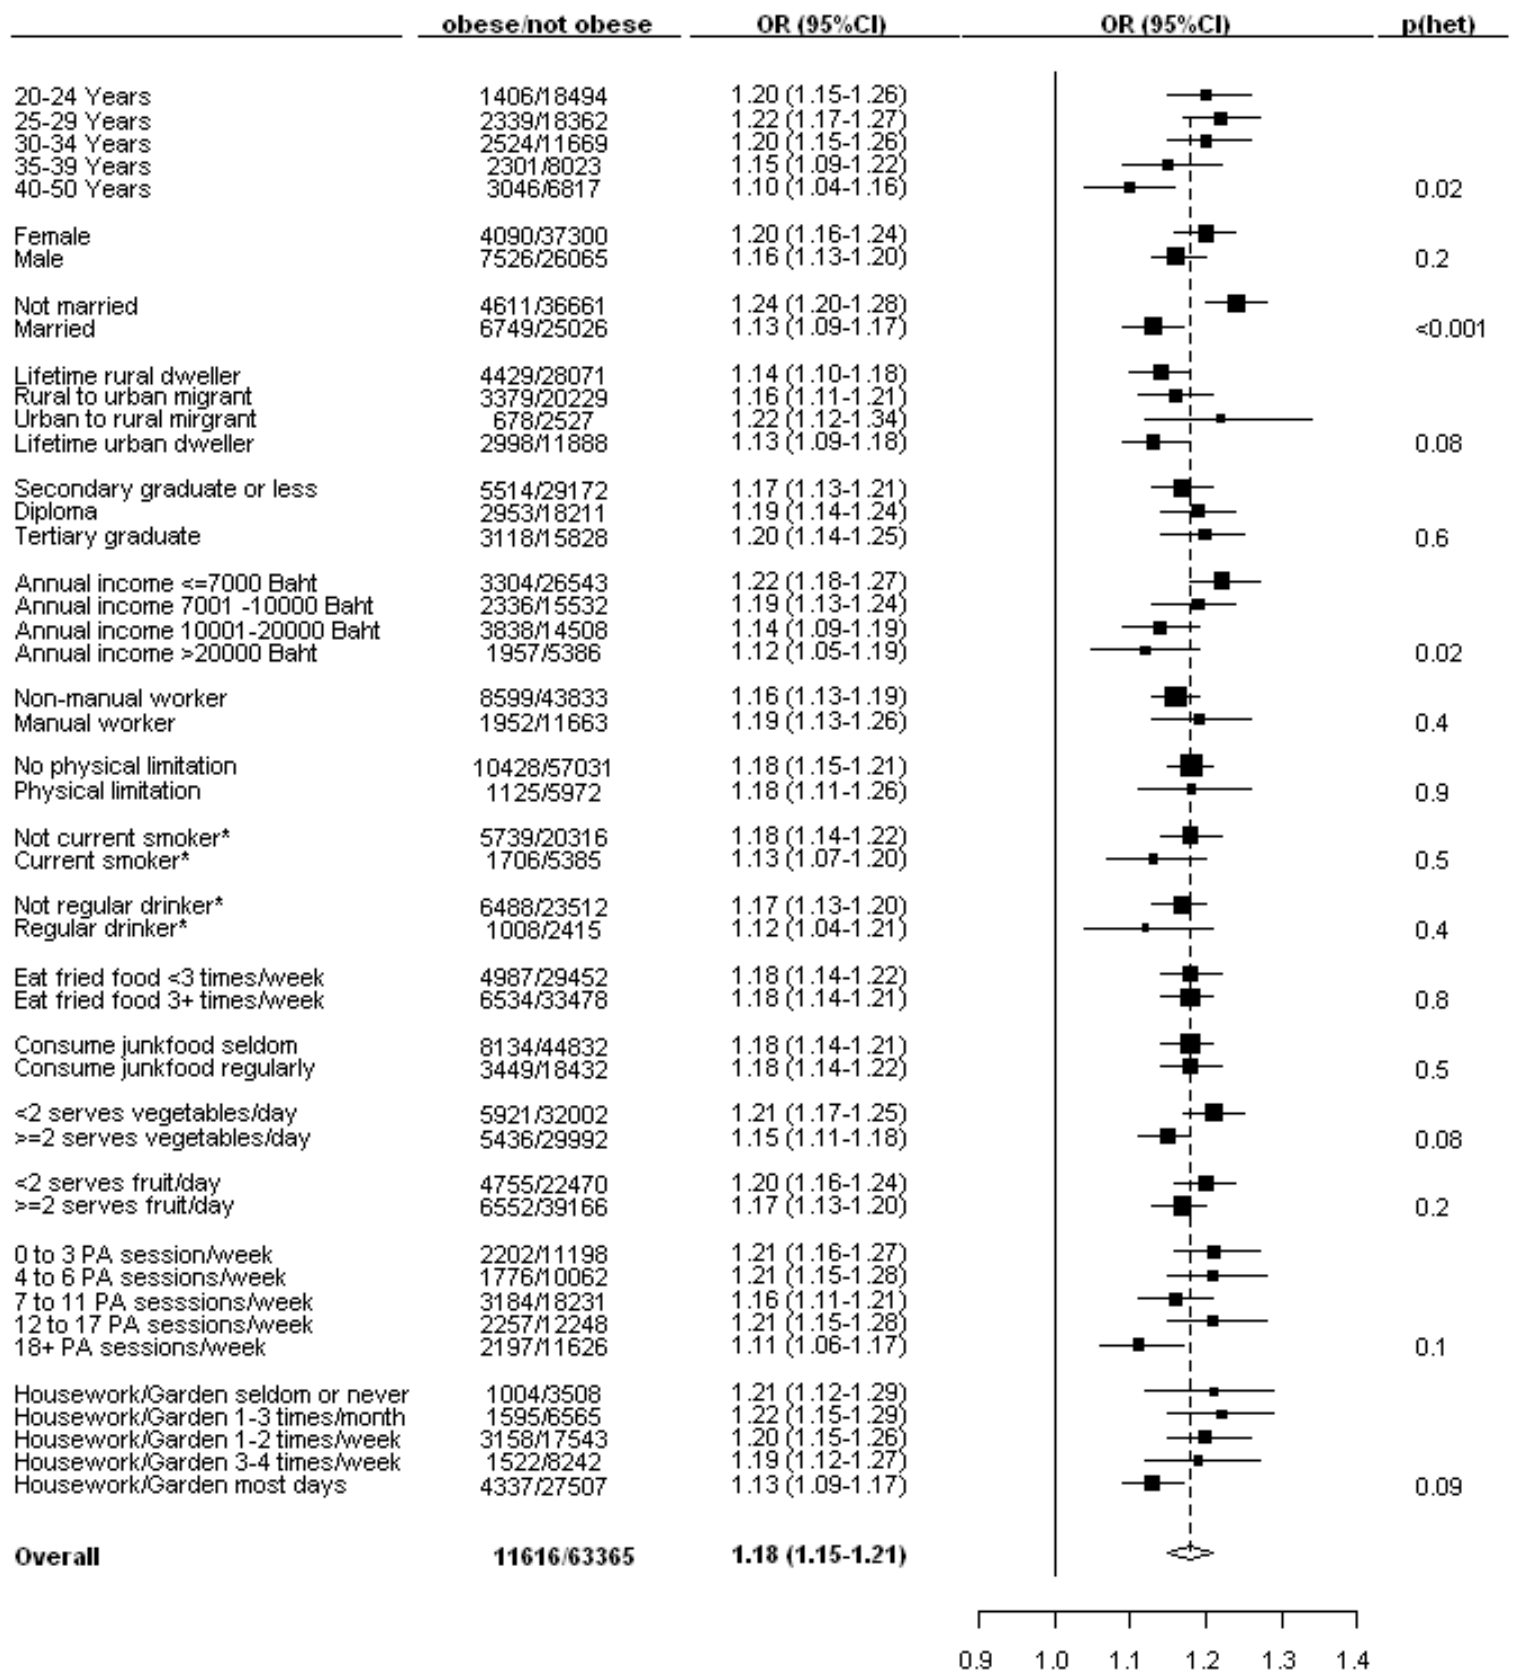

In the figure, the squares represent the OR and the horizontal lines the 95% confidence intervals. The size of the squares is proportional to the amount of statistical information (i.e. inversely proportional to the variance of the log OR).  
 \*in men only  
 p(het)= p value for heterogeneity comparing the OR for obesity per 2 hours of additional daily screen time in the different sub-groups
